# Supplementary material
Source: PubMed Central journal article supplement (PMC4331589)
Supplement: ismej2014172x1.pdf [file ismej2014172x1.pdf]

Figure S1

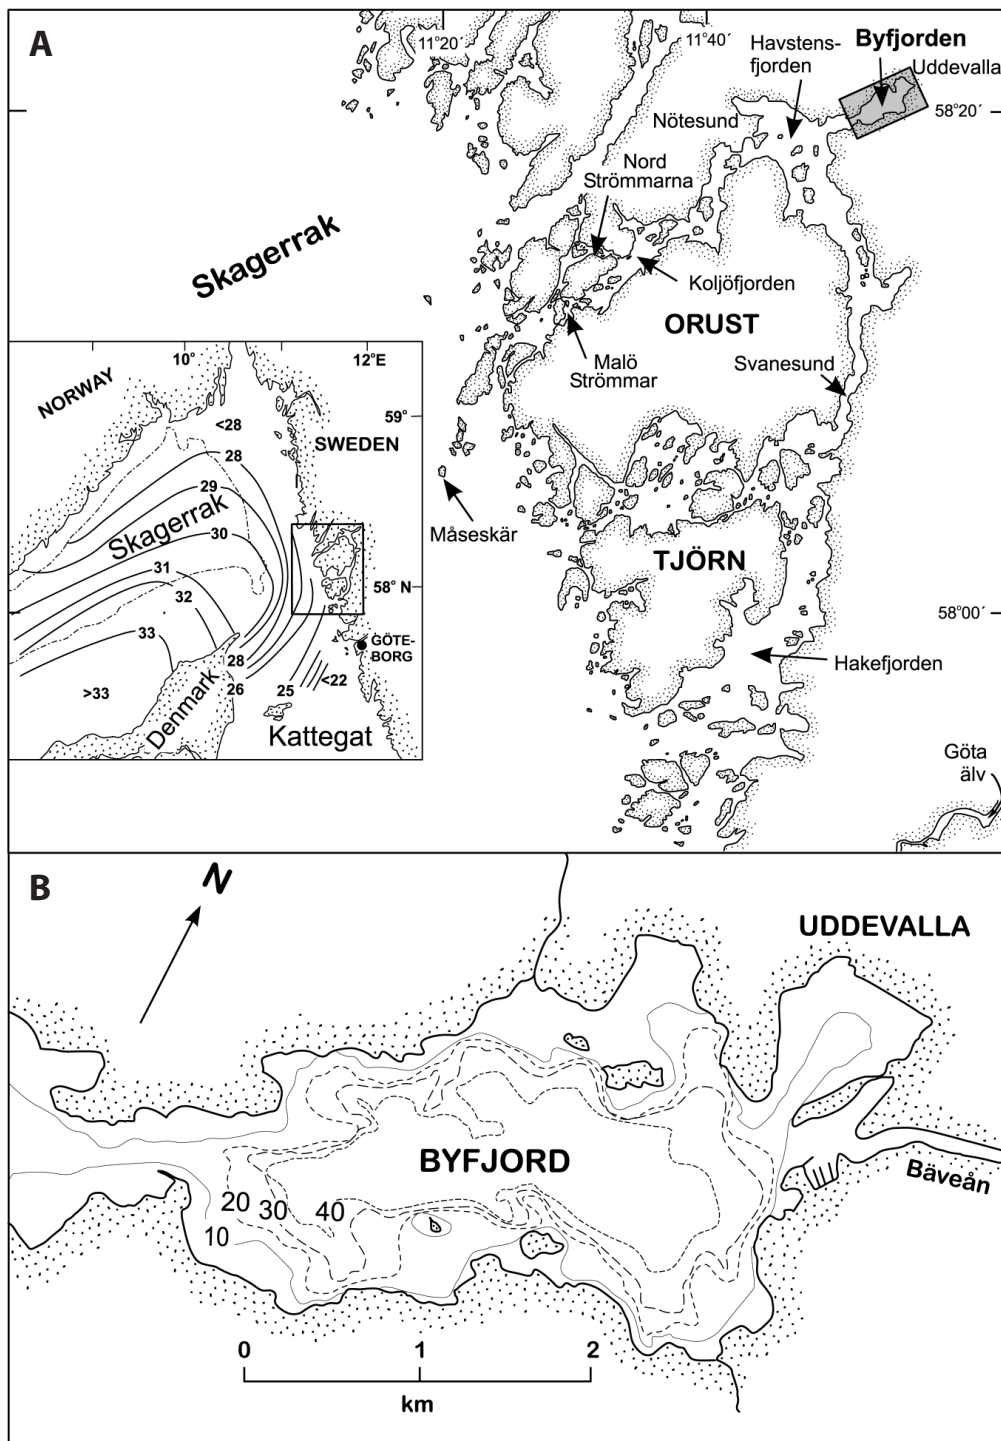

Figure S2

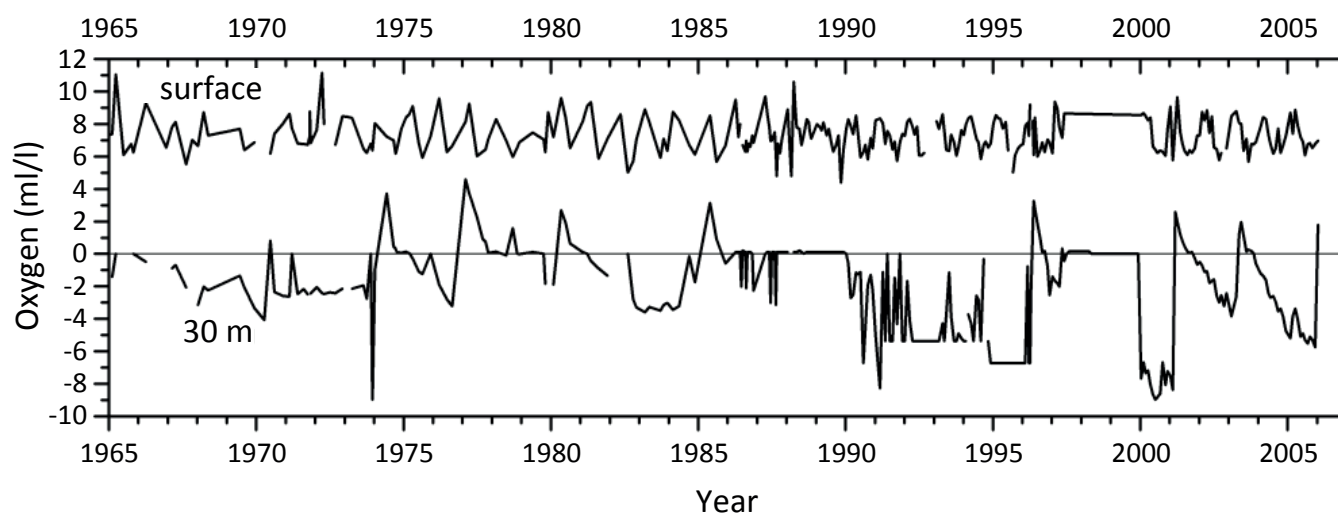

Figure S3

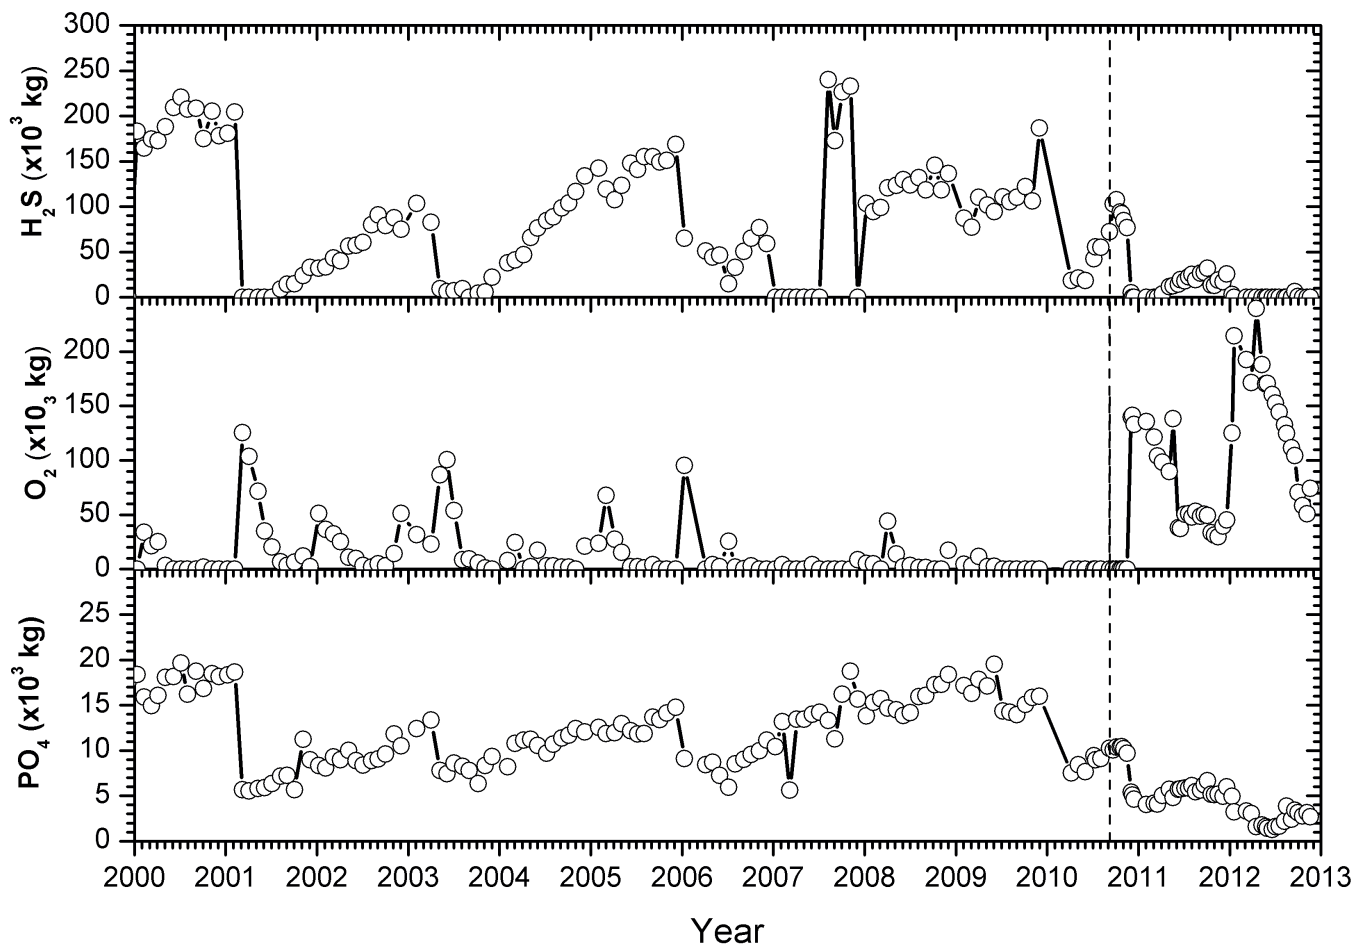

Figure S4

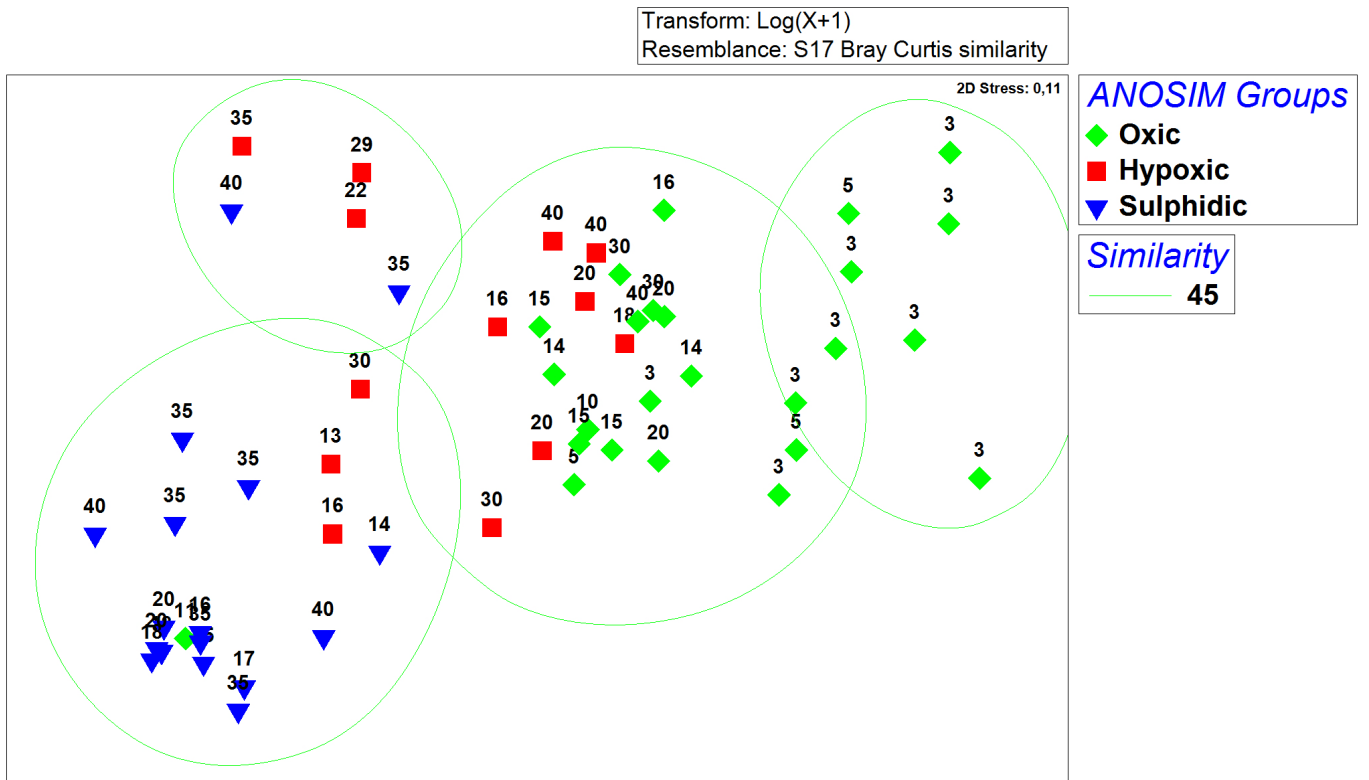

**Figure S5**

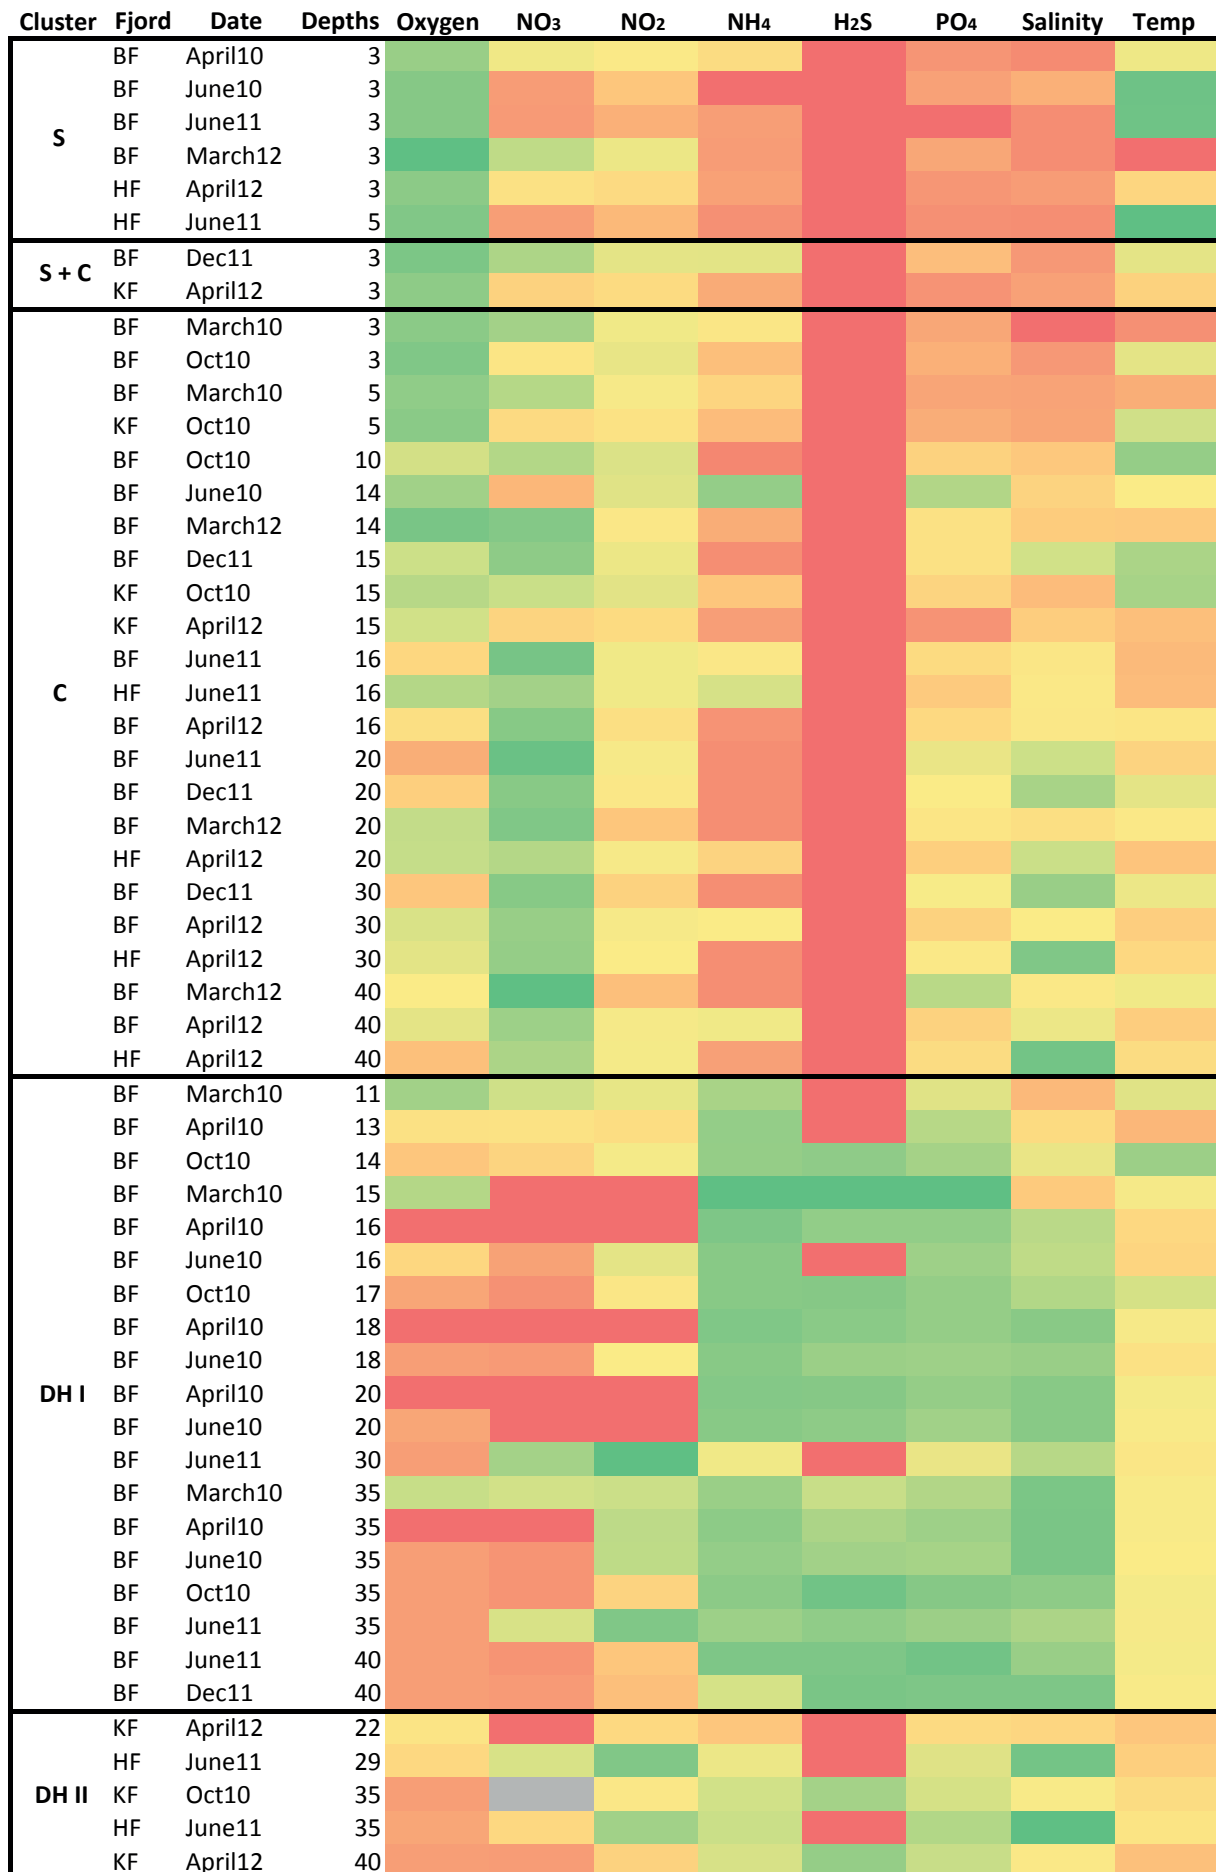

Figure S6

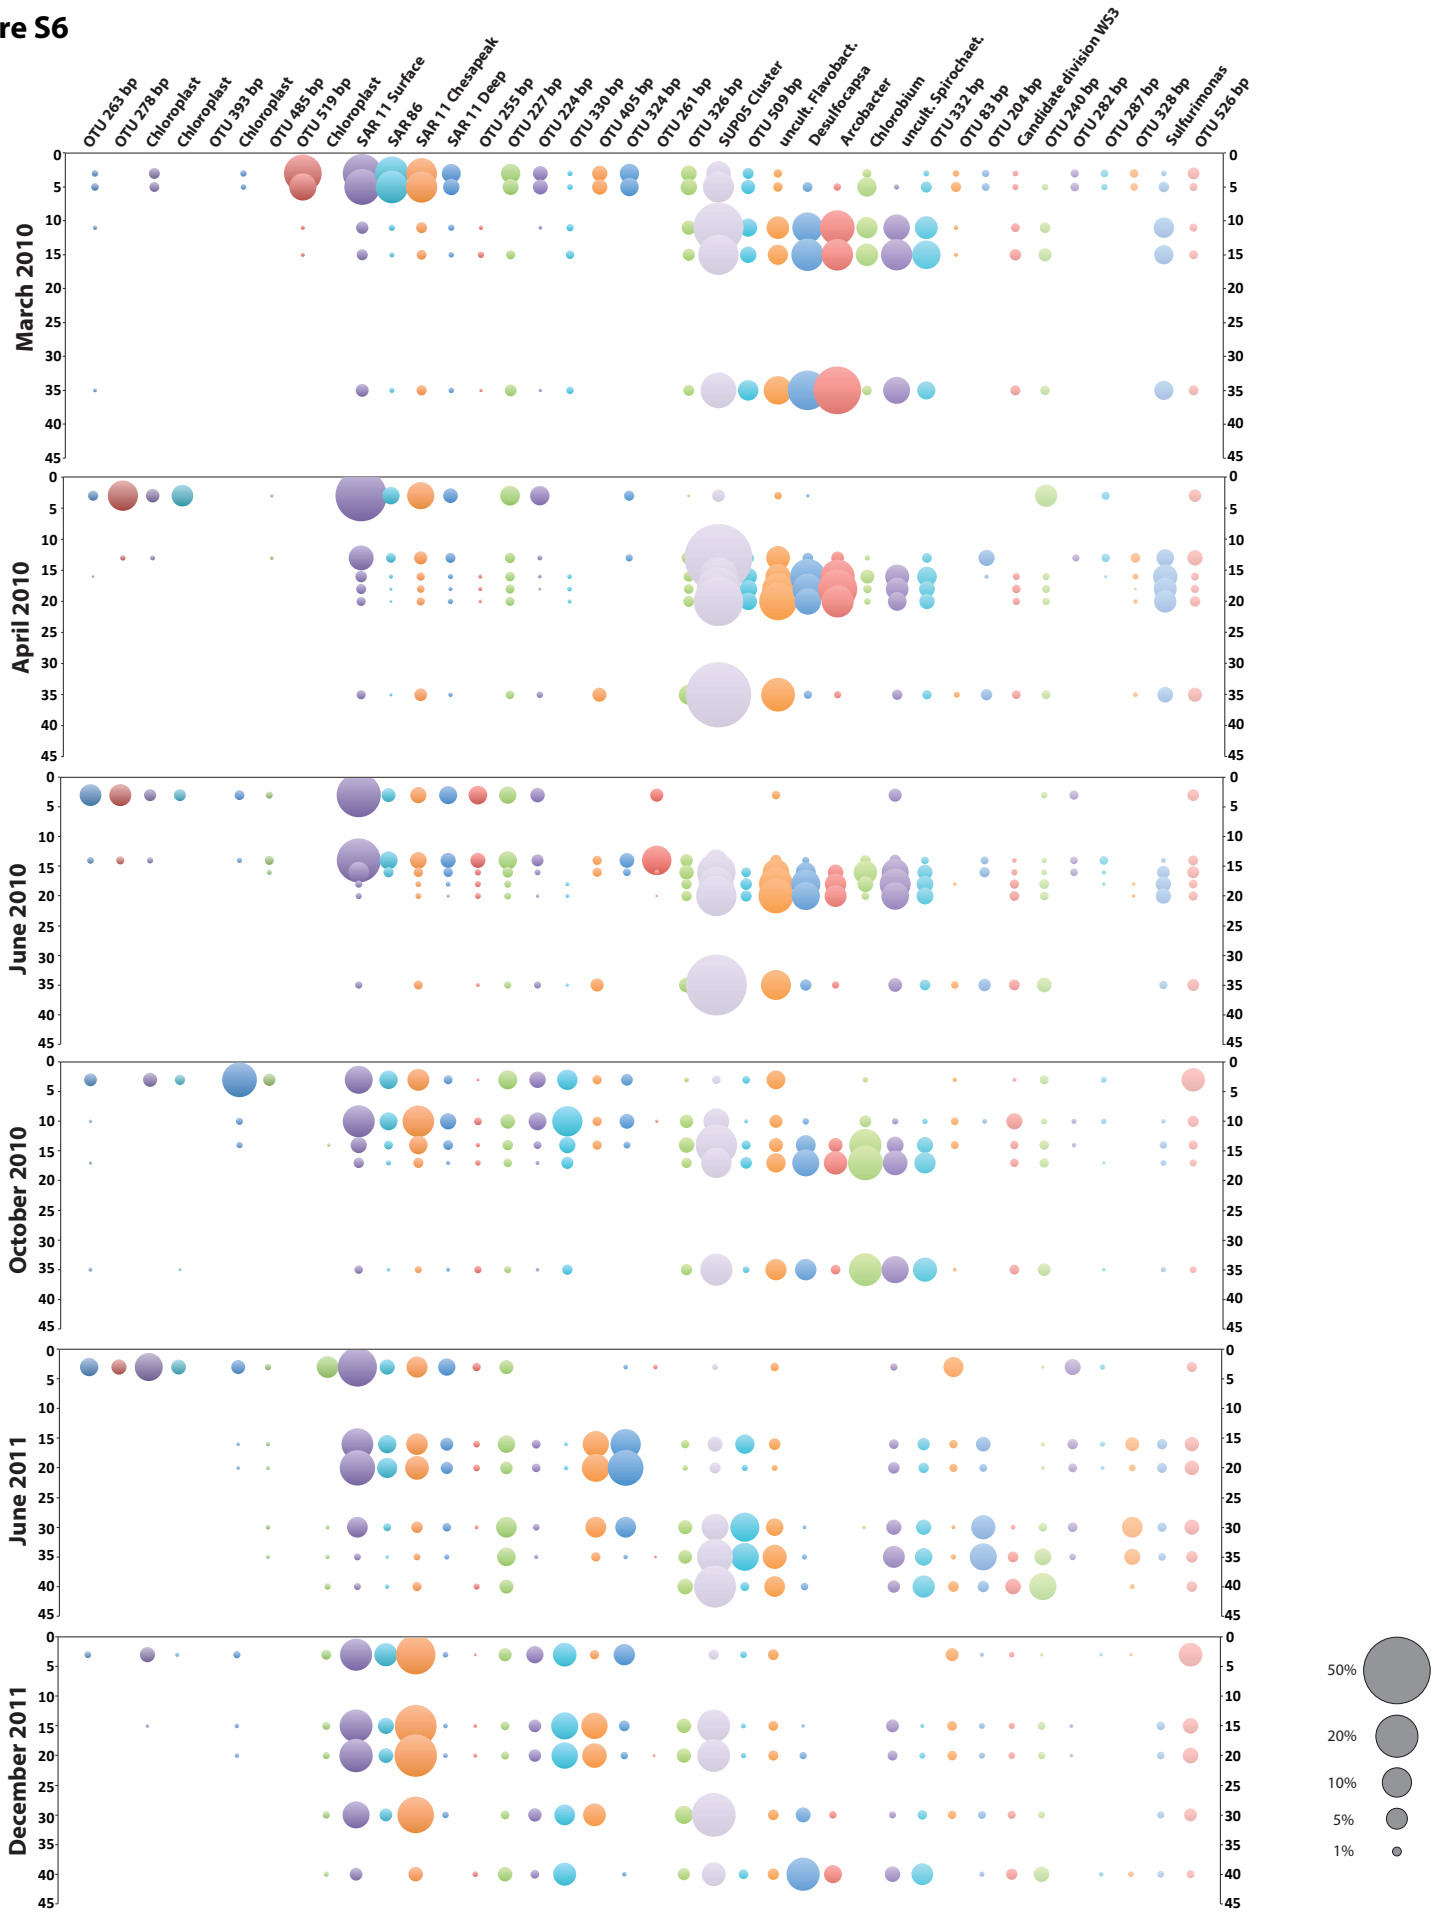

**Figure S6 (continuation)**

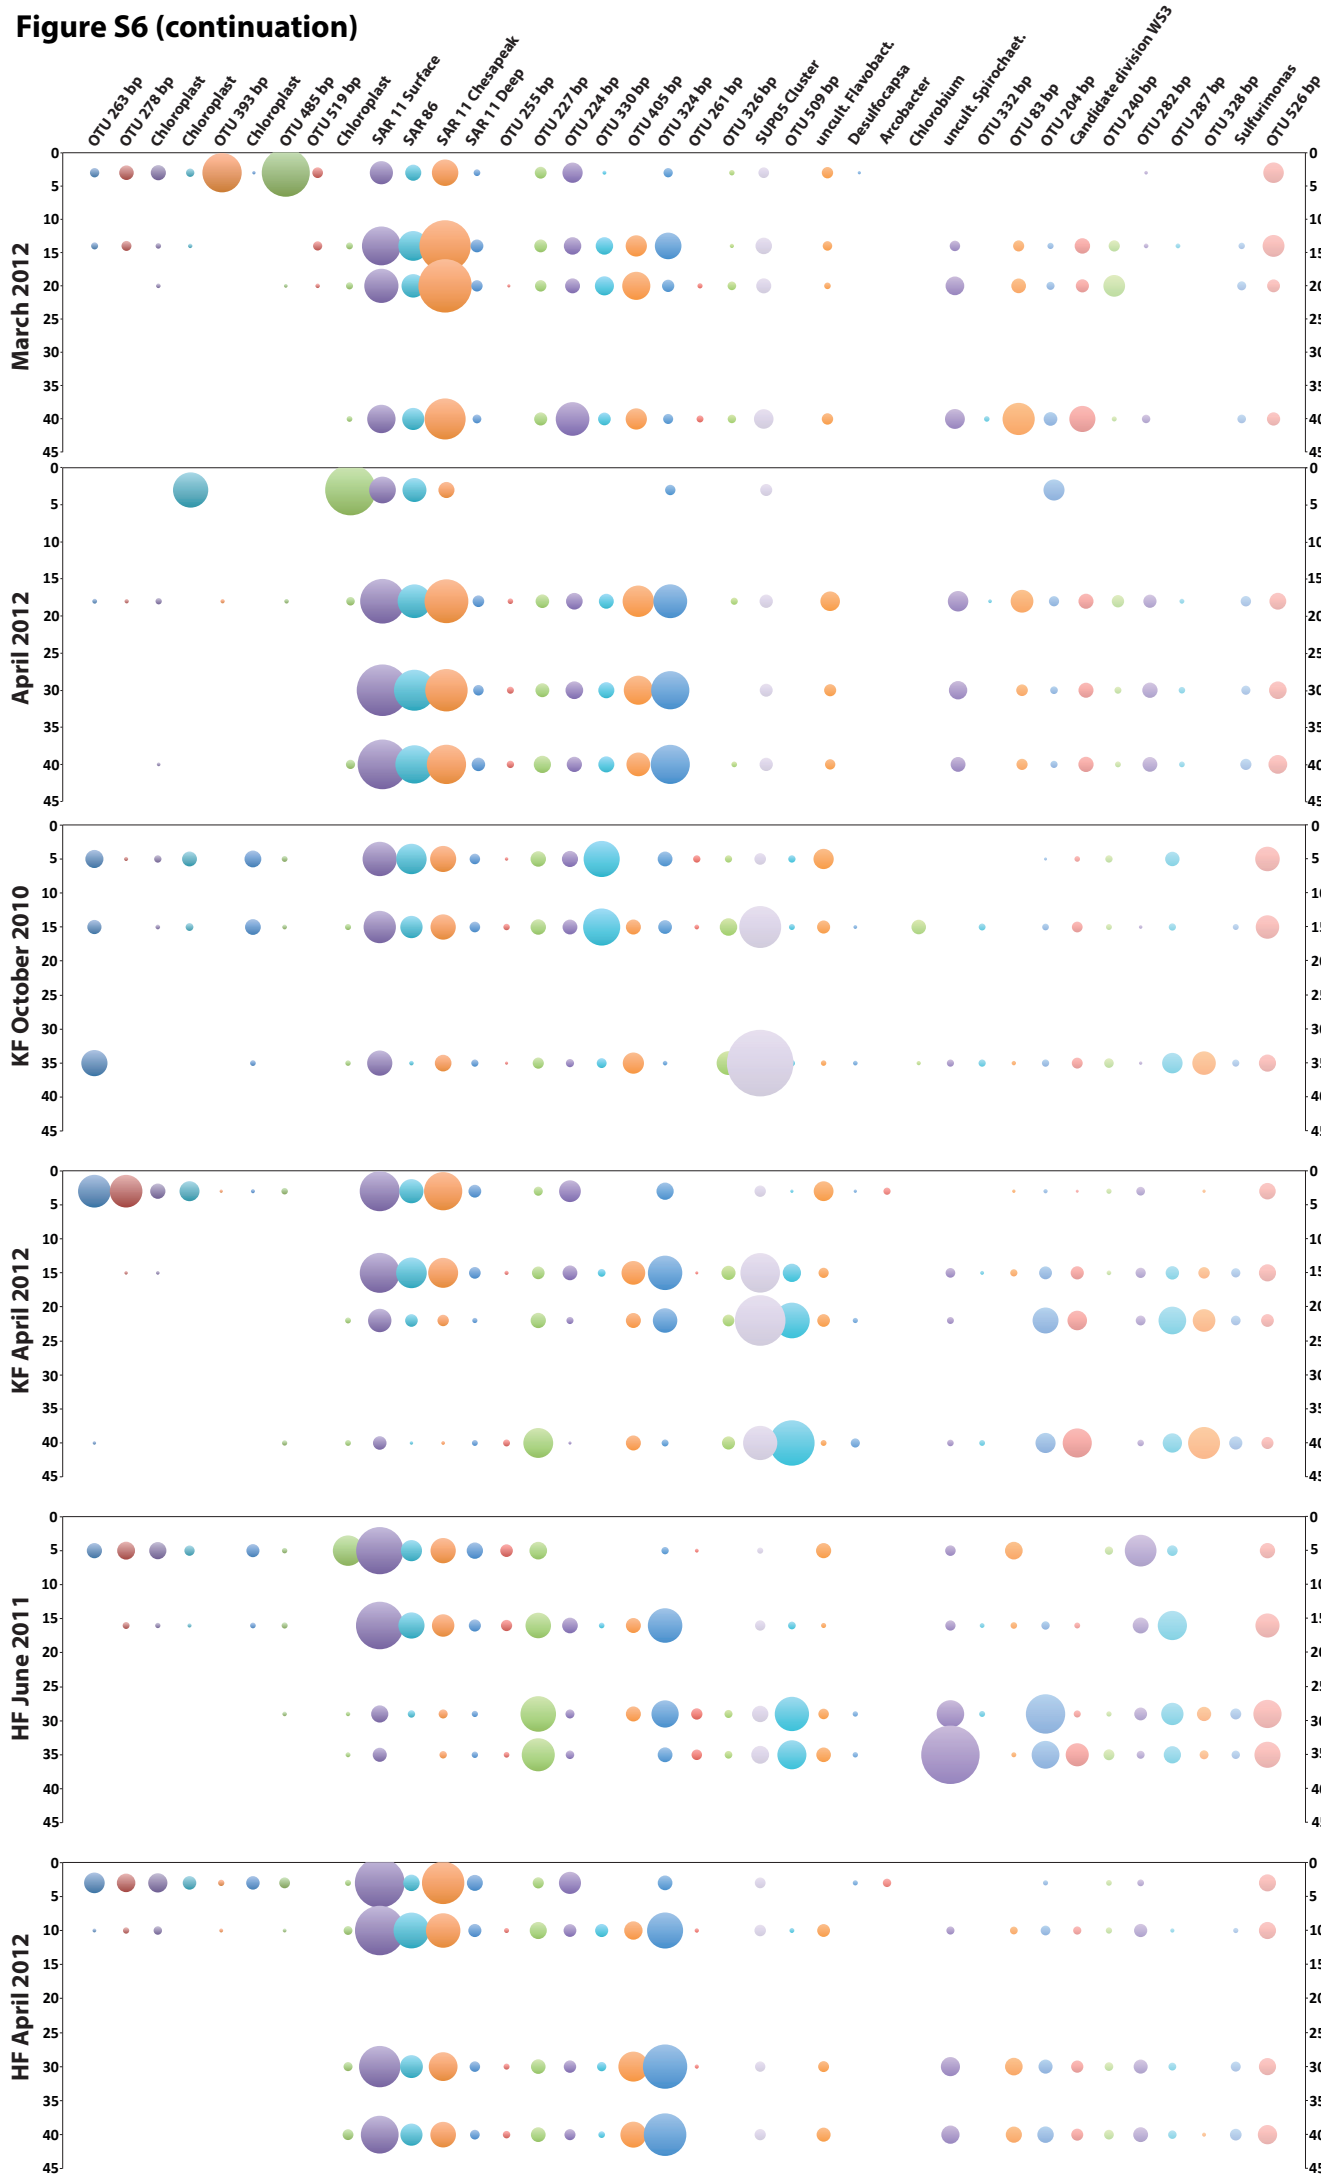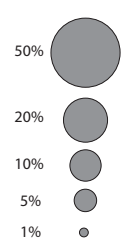

Tab. S1: Overview over samples used for molecular work

| Station/Fjord | Date collected | Depth (m) | Water filtrated (l) | DNA yield (µg) | Comments                         | CTD Data        |                |           |
|---------------|----------------|-----------|---------------------|----------------|----------------------------------|-----------------|----------------|-----------|
|               |                |           |                     |                |                                  | Oxygen (µmol/l) | Salinity (PSU) | Temp (°C) |
| Byfjord       | 15/03/10       | 3         | 5                   | 42             | Whole fjord was covered with ice | 262             | 16.5           | 2.7       |
|               |                | 5         | 5                   | 90             |                                  | 248             | 21.7           | 4.2       |
|               |                | 11        | 2.5                 | 43             |                                  | 209             | 23.8           | 8.7       |
|               |                | 15        | 3                   | 22             |                                  | 171             | 25.4           | 7.8       |
|               |                | 35        | 5                   | 76             |                                  | 145             | 31.6           | 7.7       |
|               | 27/04/10       | 3         | 5                   | 52             | 228                              | 19.4            | 8.1            |           |
|               |                | 13        | 3                   | 79             | 67                               | 27.1            | 4.6            |           |
|               |                | 16        | 2                   | 76             | 0                                | 29.8            | 6.5            |           |
|               |                | 18        | 2.5                 | 86             | 0                                | 31.2            | 7.8            |           |
|               |                | 20        | 2.5                 | 80             | 0                                | 31.2            | 7.9            |           |
|               |                | 35        | 3.5                 | 74             | 0                                | 31.6            | 7.7            |           |
|               | 14/06/10       | 3         | 11.5                | 160            | 275                              | 23.0            | 15.6           |           |
|               |                | 14        | 18                  | 107            | 213                              | 26.3            | 7.6            |           |
|               |                | 16        | 15                  | 116            | 50                               | 29.7            | 6.3            |           |
|               |                | 18        | 13                  | 128            | 3                                | 30.7            | 7.0            |           |
|               |                | 20        | 13.5                | 122            | 6                                | 31.2            | 7.7            |           |
|               |                | 35        | 15                  | 133            | 3                                | 31.6            | 7.6            |           |
|               | 28/10/10       | 3         | 15                  | 177            | 291                              | 20.5            | 8.5            |           |
|               |                | 10        | 19                  | 66             | 128                              | 25.3            | 12.6           |           |
|               |                | 14        | 30                  | 158            | 28                               | 28.7            | 12.2           |           |
|               |                | 17        | 16                  | 204            | 6                                | 30.0            | 9.2            |           |
|               |                | 35        | 18                  | 138            | 3                                | 31.0            | 7.9            |           |
|               | 6/6/11         | 3         | 14                  | 130            | 275                              | 19.5            | 15.5           |           |
|               |                | 16        | 20                  | 73             | 50                               | 28.0            | 4.8            |           |
|               |                | 20        | 20                  | 37             | 9                                | 29.4            | 6.2            |           |
|               |                | 30        | 20                  | 191            | 3                                | 29.9            | 7.3            |           |
|               |                | 35        | 18                  | 116            | 3                                | 30.2            | 7.8            |           |
|               |                | 40        | 14                  | 140            | 3                                | 30.7            | 7.9            |           |
|               | 5/12/11        | 3         | 11                  | 162            | 306                              | 20.5            | 8.5            |           |
|               |                | 15        | 25                  | 40             | 138                              | 29.3            | 11.3           |           |
|               |                | 20        | 20                  | 32             | 38                               | 30.3            | 8.5            |           |
|               |                | 30        | 20                  | 41             | 28                               | 30.7            | 8.2            |           |
|               |                | 40        | 13                  | 136            | 3                                | 31.5            | 7.7            |           |
|               | 7/3/12         | 3         | 15                  | 433            | 413                              | 19.5            | 1.5            |           |
|               |                | 14        | 20                  | 58             | 316                              | 25.5            | 5.7            |           |
|               |                | 20        | 20                  | 39             | 150                              | 27.4            | 7.5            |           |
|               |                | 40        | 20                  | 77             | 84                               | 28.2            | 8.0            |           |
|               | 19/04/12       | 3         | 15                  | 248            | 254                              | 21.3            | 6.3            |           |
|               |                | 18        | 20                  | 96             | 65                               | 28.0            | 7.3            |           |
|               |                | 30        | 20                  | 112            | 120                              | 28.3            | 5.9            |           |
| 40            |                | 20        | 149                 | 106            | 28.7                             | 5.8             |                |           |
| Havstensfjord | 7/6/11         | 5         | 15                  | 184            | 288                              | 19.6            | 17.0           |           |
|               |                | 16        | 15                  | 61             | 172                              | 28.2            | 4.9            |           |
|               |                | 29        | 15                  | 392            | 53                               | 31.8            | 5.9            |           |
|               |                | 35        | 14                  | 185            | 6                                | 32.5            | 7.2            |           |
|               | 19/4/12        | 3         | 15                  | 207            | 259                              | 21.1            | 6.4            |           |
| 20            | 15             | 52        | 147                 | 29.5           | 5.3                              |                 |                |           |
| 30            | 17             | 90        | 109                 | 31.4           | 6.5                              |                 |                |           |
| 40            | 15             | 132       | 22                  | 31.8           | 6.8                              |                 |                |           |
| Koljöfjord    | 25/10/10       | 5         | 9                   | 50             | 266                              | 22.0            | 9.4            |           |
|               |                | 15        | 6                   | 46             | 169                              | 24.1            | 11.5           |           |
|               |                | 35        | 20                  | 138            | 3                                | 28.4            | 6.8            |           |
|               | 19/04/12       | 3         | 15                  | 177            | 253                              | 21.4            | 6.1            |           |
|               |                | 15        | 15                  | 68             | 131                              | 25.6            | 5.0            |           |
|               |                | 22        | 15                  | 177            | 72                               | 26.7            | 5.4            |           |
|               |                | 35        | 15                  | 145            | 3                                | 28.2            | 5.1            |           |



Tab. S2: Environmental parameters used for correlation with T-RFLP data

| Date    | Depth    | Environmental Data        |                       |                          |                          |                          |                          |      | Temp (°C) | Salt (PSU) | Used with molecular data from |          |
|---------|----------|---------------------------|-----------------------|--------------------------|--------------------------|--------------------------|--------------------------|------|-----------|------------|-------------------------------|----------|
|         |          | H <sub>2</sub> S (μmol/l) | O <sub>2</sub> (ml/l) | PO <sub>4</sub> (μmol/l) | NO <sub>2</sub> (μmol/l) | NO <sub>3</sub> (μmol/l) | NH <sub>4</sub> (μmol/l) |      |           |            |                               |          |
| 6/4/10  | 0        | 0                         | 282                   | 0.1                      | 0.29                     | 20.5                     | 1.4                      | 4.3  | 9.8       | 15/03/10   |                               |          |
|         | 2        | 0                         | 256                   | 0.2                      | 0.25                     | 11.3                     | 1.6                      | 4.2  | 18.6      |            |                               |          |
|         | 5        | 0                         | 248                   | 0.1                      | 0.19                     | 7.9                      | 1.1                      | 3.6  | 21.6      |            |                               |          |
|         | 10       | 0                         | 221                   | 0.5                      | 0.38                     | 7.2                      | 2.0                      | 2.9  | 24.4      |            |                               |          |
|         | 15       | 144                       | 0                     | 12.0                     | 0                        | 0.0                      | 56.8                     | 7.8  | 30.5      |            |                               |          |
|         | 20       | 36                        | 0                     | 6.2                      | 0                        | 0.0                      | 27.2                     | 7.9  | 31.3      |            |                               |          |
|         | 30       | 1                         | 0                     | 4.5                      | 0.68                     | 4.4                      | 16.7                     | 7.8  | 31.5      |            |                               |          |
|         | 40       | 1                         | 0                     | 5.0                      | 0.69                     | 6.6                      | 18.7                     | 7.6  | 31.7      |            |                               |          |
|         | 44       | 1                         | 0                     | 5.7                      | 0.92                     | 3.7                      | 21.8                     | 7.6  | 31.7      |            |                               |          |
|         | 4/5/10   | 0                         | 0                     | 232                      | 0                        | 0.21                     | 5.5                      | 1.8  | 11.0      |            | 18.4                          | 27/04/10 |
| 2       |          | 0                         | 236                   | 0                        | 0.16                     | 3.7                      | 1.1                      | 9.6  | 19.5      |            |                               |          |
| 5       |          | 0                         | 212                   | 0.1                      | 0.15                     | 3.2                      | 1.7                      | 6.7  | 22.5      |            |                               |          |
| 10      |          | 0                         | 168                   | 0.8                      | 0.29                     | 6.3                      | 5.1                      | 4.5  | 25.5      |            |                               |          |
| 15      |          | 20                        | 0                     | 6.9                      | 0                        | 0.0                      | 31.2                     | 6.9  | 29.7      |            |                               |          |
| 20      |          | 36                        | 0                     | 6.5                      | 0                        | 0.0                      | 27.4                     | 7.9  | 31.3      |            |                               |          |
| 30      |          | 1                         | 0                     | 4.9                      | 2.35                     | 0.0                      | 17.9                     | 7.8  | 31.5      |            |                               |          |
| 40      |          | 10                        | 0                     | 6.5                      | 0                        | 0.0                      | 26.3                     | 7.6  | 31.7      |            |                               |          |
| 44      |          | 20                        | 0                     | 7.4                      | 0                        | 0.0                      | 31.2                     | 7.6  | 31.7      |            |                               |          |
| 1/6/10  |          | 0                         | 0                     | 215                      | 0.1                      | 0.06                     | 0.1                      | 0.1  | 15.2      | 22.5       | 14/06/10                      |          |
|         | 2        | 0                         | 216                   | 0.1                      | 0.05                     | 0.1                      | 0.1                      | 15.2 | 22.5      |            |                               |          |
|         | 5        | 0                         | 208                   | 0.1                      | 0.05                     | 0.1                      | 0.1                      | 11.6 | 23.3      |            |                               |          |
|         | 10       | 0                         | 157                   | 0.1                      | 0.18                     | 2.0                      | 0.1                      | 7.5  | 25.0      |            |                               |          |
|         | 15       | 0                         | 3                     | 5.9                      | 0.42                     | 0.2                      | 25.6                     | 6.7  | 30.1      |            |                               |          |
|         | 20       | 25                        | 0                     | 5.8                      | 0                        | 0.0                      | 25.5                     | 7.9  | 31.3      |            |                               |          |
|         | 30       | 0                         | 0                     | 4.3                      | 1.83                     | 0.1                      | 15.1                     | 7.8  | 31.5      |            |                               |          |
|         | 40       | 21                        | 0                     | 6.6                      | 0                        | 0.0                      | 26.4                     | 7.6  | 31.7      |            |                               |          |
|         | 44       | 42                        | 0                     | 7.6                      | 0                        | 0.0                      | 35.6                     | 7.7  | 31.7      |            |                               |          |
|         | 26/10/10 | 0                         | 0                     | 202                      | 0.1                      | 0.21                     | 4.7                      | 0.7  | 8.5       | 16.6       |                               | 28/10/10 |
| 2       |          | 0                         | 189                   | 0.2                      | 0.23                     | 2.4                      | 0.7                      | 9.9  | 20.8      |            |                               |          |
| 5       |          | 0                         | 143                   | 0.4                      | 0.43                     | 3.1                      | 0.8                      | 11.6 | 23.1      |            |                               |          |
| 10      |          | 0                         | 71                    | 1.0                      | 0.43                     | 8.1                      | 0.2                      | 12.6 | 25.3      |            |                               |          |
| 15      |          | 31                        | 0                     | 6.6                      | 0.15                     | 0.0                      | 24.2                     | 10.5 | 29.5      |            |                               |          |
| 20      |          | 44                        | 0                     | 6.6                      | 0.13                     | 0.0                      | 28.1                     | 8.3  | 30.4      |            |                               |          |
| 30      |          | 55                        | 0                     | 6.8                      | 0.08                     | 0.1                      | 23.2                     | 8.2  | 30.8      |            |                               |          |
| 40      |          | 102                       | 0                     | 8.5                      | 0.09                     | 0.1                      | 23.2                     | 7.7  | 31.6      |            |                               |          |
| 8/6/11  |          | 0                         | 0                     | 213                      | 0                        | 0.06                     | 0.2                      | 0.2  | 16.6      | 19.1       | 6/6/11                        |          |
|         |          | 2                         | 0                     | 211                      | 0                        | 0.02                     | 0.1                      | 0.2  | 15.8      | 19.5       |                               |          |
|         | 5        | 0                         | 185                   | 0                        | 0.02                     | 0.1                      | 0.6                      | 14.4 | 19.9      |            |                               |          |
|         | 10       | 0                         | 158                   | 0.1                      | 0.17                     | 3.9                      | 3.5                      | 9.7  | 21.9      |            |                               |          |
|         | 15       | 0                         | 91                    | 1.1                      | 0.24                     | 16.8                     | 1.8                      | 4.8  | 28.1      |            |                               |          |
|         | 20       | 0                         | 52                    | 2.5                      | 0.19                     | 21.0                     | 0.2                      | 6.5  | 29.5      |            |                               |          |
|         | 30       | 0                         | 3                     | 2.5                      | 7.21                     | 10.0                     | 2.2                      | 7.5  | 30.0      |            |                               |          |
|         | 40       | 48                        | 0                     | 9.6                      | 0.05                     | 0.1                      | 30.6                     | 8.0  | 30.6      |            |                               |          |
|         | 44       | 82                        | 0                     | 11.8                     | 0.04                     | 0.1                      | 44.1                     | 8.1  | 30.8      |            |                               |          |
|         | 5/12/11  | 0                         | 0                     | 231                      | 0.4                      | 0.38                     | 14.0                     | 5.2  | 5.5       | 13.8       |                               | 5/12/11  |
| 2       |          | 0                         | 222                   | 0.5                      | 0.36                     | 9.5                      | 3.8                      | 7.2  | 16.8      |            |                               |          |
| 5       |          | 0                         | 208                   | 0.5                      | 0.28                     | 7.5                      | 2.1                      | 7.7  | 20.0      |            |                               |          |
| 10      |          | 0                         | 206                   | 0.5                      | 0.22                     | 7.3                      | 1.7                      | 7.9  | 20.9      |            |                               |          |
| 15      |          | 0                         | 50                    | 1.6                      | 0.26                     | 13.1                     | 0.2                      | 10.8 | 25.8      |            |                               |          |
| 20      |          | 0                         | 27                    | 2.0                      | 0.15                     | 14.2                     | 0.2                      | 11.0 | 26.5      |            |                               |          |
| 30      |          | 0                         | 21                    | 2.1                      | 0.08                     | 14.4                     | 0.2                      | 11.2 | 26.8      |            |                               |          |
| 40      |          | 56                        | 0                     | 8.5                      | 0.04                     | 0.1                      | 4.5                      | 10.2 | 29.0      |            |                               |          |
| 45      |          | 154                       | 0                     | 17.0                     | 0.03                     | 0.1                      | 5.4                      | 8.7  | 30.2      |            |                               |          |
| 7/3/12  |          | 0                         | 0                     | 308                      | 0                        | 0.30                     | 7.0                      | 0.2  | 1.3       | 19.2       | 7/3/12                        |          |
|         | 2        | 0                         | 311                   | 0                        | 0.24                     | 5.0                      | 0.2                      | 1.3  | 19.2      |            |                               |          |
|         | 5        | 0                         | 271                   | 0.4                      | 0.30                     | 10.7                     | 0.5                      | 1.4  | 21.4      |            |                               |          |
|         | 10       | 0                         | 246                   | 0.7                      | 0.42                     | 13.5                     | 1.5                      | 0.4  | 22.8      |            |                               |          |
|         | 15       | 0                         | 99                    | 1.8                      | 0.08                     | 15.3                     | 0.2                      | 8.0  | 27.1      |            |                               |          |
|         | 20       | 0                         | 108                   | 1.8                      | 0.05                     | 15.4                     | 0.2                      | 7.7  | 27.5      |            |                               |          |
|         | 25       | 0                         | 107                   | 1.9                      | 0.05                     | 15.6                     | 0.2                      | 7.9  | 27.8      |            |                               |          |
|         | 30       | 0                         | 96                    | 2.1                      | 0.04                     | 16.3                     | 0.2                      | 7.9  | 27.9      |            |                               |          |
|         | 35       | 0                         | 73                    | 2.3                      | 0.60                     | 17.4                     | 0.2                      | 8.0  | 28.1      |            |                               |          |
|         | 40       | 0                         | 39                    | 4.3                      | 0.04                     | 24.1                     | 0.2                      | 8.2  | 28.2      |            |                               |          |
| 45      | 0        | 33                        | 4.9                   | 0.22                     | 24.4                     | 0.8                      | 8.2                      | 28.2 |           |            |                               |          |
| 16/4/12 | 0        | 0                         | 248                   | 0.1                      | 0.18                     | 4.9                      | 0.2                      | 6.0  | 19.9      | 19/04/12   |                               |          |
|         | 2        | 0                         | 246                   | 0.1                      | 0.17                     | 4.4                      | 0.2                      | 5.8  | 20.6      |            |                               |          |
|         | 5        | 0                         | 213                   | 0.1                      | 0.14                     | 4.4                      | 0.4                      | 4.9  | 22.0      |            |                               |          |
|         | 10       | 0                         | 137                   | 0.7                      | 0.24                     | 11.4                     | 0.8                      | 5.2  | 25.8      |            |                               |          |
|         | 15       | 0                         | 97                    | 1.5                      | 0.10                     | 15.0                     | 0.2                      | 7.7  | 28.0      |            |                               |          |
|         | 20       | 0                         | 112                   | 1.2                      | 0.14                     | 14.0                     | 0.3                      | 6.2  | 28.1      |            |                               |          |
|         | 30       | 0                         | 114                   | 1.0                      | 0.19                     | 11.7                     | 1.5                      | 5.8  | 28.3      |            |                               |          |
|         | 40       | 0                         | 113                   | 1.0                      | 0.20                     | 10.9                     | 2.2                      | 5.8  | 28.7      |            |                               |          |
|         | 44.5     | 0                         | 112                   | 1.0                      | 0.20                     | 11.1                     | 2.4                      | 5.8  | 28.8      |            |                               |          |
|         | 8/6/11   | 0                         | 0                     | 216                      | 0                        | 0.02                     | 0.1                      | 0.2  | 18.2      |            | 19.5                          | 7/6/11   |
| 2       |          | 0                         | 215                   | 0                        | 0.02                     | 0.1                      | 0.2                      | 17.1 | 19.6      |            |                               |          |
| 5       |          | 0                         | 194                   | 0                        | 0.03                     | 0.1                      | 0.2                      | 15.1 | 19.9      |            |                               |          |
| 10      |          | 0                         | 152                   | 0                        | 0.20                     | 5.1                      | 1.6                      | 8.1  | 23.1      |            |                               |          |
| 15      |          | 0                         | 115                   | 0.8                      | 0.24                     | 9.8                      | 4.8                      | 4.6  | 28.3      |            |                               |          |
| 20      |          | 0                         | 110                   | 1.0                      | 0.21                     | 11.8                     | 3.4                      | 4.3  | 29.1      |            |                               |          |
| 30      |          | 0                         | 4                     | 3.1                      | 3.91                     | 4.3                      | 2.4                      | 6.6  | 32.1      |            |                               |          |
| 39      |          | 0                         | 0                     | 6.0                      | 0.15                     | 0.0                      | 9.0                      | 7.4  | 32.6      |            |                               |          |
| 3/4/12  |          | 0                         | 0                     | 248                      | 0                        | 0.10                     | 1.9                      | 0.2  | 5.0       | 20.6       | 19/04/12                      |          |
|         |          | 2                         | 0                     | 248                      | 0                        | 0.10                     | 2.0                      | 0.3  | 4.8       | 20.6       |                               |          |
|         | 5        | 0                         | 243                   | 0                        | 0.12                     | 3.3                      | 0.6                      | 4.3  | 21.2      |            |                               |          |
|         | 10       | 0                         | 148                   | 0.6                      | 0.23                     | 11.5                     | 0.8                      | 4.8  | 27.8      |            |                               |          |
|         | 15       | 0                         | 158                   | 0.8                      | 0.22                     | 8.3                      | 1.1                      | 5.0  | 29.6      |            |                               |          |
|         | 20       | 0                         | 160                   | 0.9                      | 0.19                     | 7.9                      | 1.1                      | 5.0  | 29.9      |            |                               |          |
|         | 30       | 0                         | 72                    | 1.9                      | 0.16                     | 12.3                     | 0.2                      | 7.0  | 31.7      |            |                               |          |
|         | 39       | 0                         | 27                    | 1.5                      | 0.21                     | 9.0                      | 0.3                      | 6.8  | 31.9      |            |                               |          |
|         | 3/11/10  | 0 NaN                     | 199                   | 0.2                      | 0.12                     | 1.8                      | 0.7                      | 9.3  | 22.1      | 25/10/10   |                               |          |
|         |          | 2 NaN                     | 198                   | 0.2                      | 0.13                     | 2.0                      | 0.8                      | 9.4  | 22.1      |            |                               |          |
| 5 NaN   |          | 197                       | 0.2                   | 0.13                     | 2.0                      | 0.7                      | 9.3                      | 22.1 |           |            |                               |          |
| 10 NaN  |          | 193                       | 0.2                   | 0.14                     | 2.0                      | 0.8                      | 9.4                      | 22.2 |           |            |                               |          |
| 15 NaN  |          | 67                        | 1.1                   | 0.36                     | 6.2                      | 0.8                      | 10.9                     | 25.2 |           |            |                               |          |
| 20      |          | 9                         | 0                     | 3.1                      | 0.16 NaN                 |                          | 7.8                      | 7.6  | 28.0      |            |                               |          |
| 30      |          | 8                         | 0                     | 3.2                      | 0.15 NaN                 |                          | 2.9                      | 6.8  | 28.4      |            |                               |          |
| 40      |          | 11                        | 0                     | 3.3                      | 0.15 NaN                 |                          | 7.4                      | 6.9  | 28.5      |            |                               |          |
| 8/5/12  |          | 0 NaN                     | 224                   | 0                        | 0.12                     | 1.6                      | 0.5                      | 10.4 | 21.7      |            | 19/04/12                      |          |
|         |          | 2 NaN                     | 224                   | 0                        | 0.11                     | 1.5                      | 0.6                      | 10.2 | 21.7      |            |                               |          |
|         | 5 NaN    | 224                       | 0                     | 0.11                     | 1.6                      | 0.3                      | 5.8                      | 21.7 |           |            |                               |          |
|         | 10 NaN   | 199                       | 0                     | 0.22                     | 4.4                      | 1.3                      | 6.4                      | 23.2 |           |            |                               |          |
|         | 15 NaN   | 106                       | 0.5                   | 0.10                     | 13.5                     | 0.2                      | 5.2                      | 25.8 |           |            |                               |          |
|         | 20 NaN   | 53                        | 0.9                   | 0.10                     | 13.2                     | 0.2                      | 5.4                      | 26.7 |           |            |                               |          |
|         | 30       | 19                        | 0                     | 3.2                      | 0.11                     | 0.1                      | 3.4                      | 5.2  | 28.2      |            |                               |          |
|         | 40       | 20                        | 0                     | 3.7                      | 0.08                     | 0.1                      | 4.3                      | 5.2  | 28.3      |            |                               |          |

**Tab. S3:** Results of the SIMPER analysis

**Group Oxidic**

Average similarity: 50.97

| OTU | Av.Abund | Contrib% | Cum.% |
|-----|----------|----------|-------|
| 113 | 2.67     | 11.04    | 11.04 |
| 293 | 2.22     | 8.67     | 19.71 |
| 188 | 1.76     | 6.73     | 26.43 |
| 526 | 1.23     | 4.51     | 30.94 |
| 227 | 1.11     | 3.99     | 34.94 |
| 324 | 1.34     | 3.92     | 38.85 |
| 224 | 1.09     | 3.91     | 42.76 |
| 193 | 1.25     | 3.54     | 46.30 |
| 294 | 0.89     | 3.05     | 49.35 |
| 285 | 0.80     | 2.58     | 51.93 |
| 319 | 0.71     | 2.58     | 54.51 |
| 410 | 0.64     | 2.20     | 56.71 |
| 405 | 0.91     | 2.15     | 58.86 |
| 330 | 0.86     | 1.61     | 60.46 |
| 378 | 0.47     | 1.51     | 61.97 |
| 411 | 0.62     | 1.49     | 63.46 |
| 295 | 0.62     | 1.32     | 64.78 |
| 258 | 0.47     | 1.21     | 65.98 |
| 194 | 0.57     | 1.15     | 67.13 |
| 263 | 0.62     | 1.12     | 68.26 |
| 413 | 0.55     | 1.07     | 69.33 |
| 282 | 0.53     | 1.05     | 70.38 |

**Group Hypoxic**

Average similarity: 49.74

| OTU | Av.Abund | Contrib% | Cum.% |
|-----|----------|----------|-------|
| 193 | 2.51     | 9.64     | 9.64  |
| 285 | 1.51     | 5.09     | 14.72 |
| 194 | 1.45     | 4.70     | 19.42 |
| 113 | 1.35     | 4.27     | 23.69 |
| 526 | 0.97     | 3.59     | 27.28 |
| 227 | 1.00     | 3.32     | 30.60 |
| 326 | 0.90     | 3.20     | 33.80 |
| 293 | 1.10     | 3.11     | 36.91 |
| 332 | 1.00     | 2.87     | 39.78 |
| 500 | 0.86     | 2.76     | 42.54 |
| 509 | 1.05     | 2.63     | 45.17 |
| 410 | 0.71     | 2.62     | 47.79 |
| 269 | 1.11     | 2.57     | 50.36 |
| 207 | 0.75     | 2.23     | 52.59 |
| 525 | 0.77     | 2.19     | 54.77 |
| 405 | 0.87     | 1.97     | 56.74 |
| 238 | 0.59     | 1.91     | 58.65 |
| 425 | 0.78     | 1.82     | 60.47 |
| 240 | 0.63     | 1.80     | 62.27 |
| 204 | 0.79     | 1.66     | 63.93 |
| 273 | 0.50     | 1.61     | 65.54 |
| 229 | 0.87     | 1.47     | 67.01 |
| 305 | 0.41     | 1.36     | 68.37 |
| 538 | 0.58     | 1.34     | 69.71 |
| 260 | 0.42     | 1.23     | 70.94 |

Overlap with the 38 most abundant OTUs after first analysis

**Groups Oxidic & Hypoxic**

Average dissimilarity = 61.08

| OTU | Av.Abund Group Oxidic | Av.Abund Group Hypoxic | Contrib% | Cum.% |
|-----|-----------------------|------------------------|----------|-------|
| 193 | 1.25                  | 2.51                   | 2.92     | 2.92  |
| 113 | 2.67                  | 1.35                   | 2.71     | 5.63  |
| 293 | 2.22                  | 1.10                   | 2.59     | 8.22  |
| 188 | 1.76                  | 0.57                   | 2.49     | 10.71 |
| 324 | 1.34                  | 0.68                   | 2.26     | 12.98 |
| 194 | 0.57                  | 1.45                   | 2.06     | 15.04 |
| 269 | 0.18                  | 1.11                   | 2.05     | 17.09 |
| 509 | 0.29                  | 1.05                   | 1.81     | 18.90 |
| 285 | 0.80                  | 1.51                   | 1.77     | 20.67 |
| 332 | 0.17                  | 1.00                   | 1.76     | 22.42 |
| 229 | 0.15                  | 0.87                   | 1.73     | 24.15 |
| 405 | 0.91                  | 0.87                   | 1.69     | 25.84 |
| 330 | 0.86                  | 0.48                   | 1.67     | 27.51 |
| 224 | 1.09                  | 0.45                   | 1.58     | 29.09 |
| 525 | 0.08                  | 0.77                   | 1.43     | 30.52 |
| 425 | 0.14                  | 0.78                   | 1.42     | 31.93 |
| 204 | 0.29                  | 0.79                   | 1.38     | 33.31 |
| 326 | 0.44                  | 0.90                   | 1.32     | 34.63 |
| 500 | 0.28                  | 0.86                   | 1.31     | 35.94 |
| 514 | 0.27                  | 0.55                   | 1.23     | 37.18 |
| 263 | 0.62                  | 0.09                   | 1.23     | 38.41 |
| 295 | 0.62                  | 0.02                   | 1.18     | 39.59 |
| 294 | 0.89                  | 0.37                   | 1.14     | 40.73 |
| 413 | 0.55                  | 0.38                   | 1.13     | 41.86 |
| 207 | 0.44                  | 0.75                   | 1.11     | 42.97 |
| 227 | 1.11                  | 1.00                   | 1.11     | 44.07 |
| 411 | 0.62                  | 0.35                   | 1.09     | 45.16 |
| 538 | 0.40                  | 0.58                   | 1.08     | 46.24 |
| 278 | 0.55                  | 0.01                   | 1.07     | 47.32 |
| 319 | 0.71                  | 0.25                   | 1.07     | 48.38 |
| 83  | 0.50                  | 0.37                   | 1.03     | 49.41 |
| 526 | 1.23                  | 0.97                   | 1.01     | 50.42 |
| 287 | 0.38                  | 0.35                   | 0.99     | 51.42 |
| 282 | 0.53                  | 0.29                   | 0.96     | 52.38 |
| 328 | 0.08                  | 0.49                   | 0.96     | 53.35 |
| 240 | 0.43                  | 0.63                   | 0.96     | 54.30 |
| 479 | 0.46                  | 0.04                   | 0.86     | 55.16 |
| 388 | 0.42                  | 0.00                   | 0.81     | 55.97 |
| 303 | 0.41                  | 0.18                   | 0.81     | 56.78 |
| 260 | 0.21                  | 0.42                   | 0.81     | 57.58 |
| 258 | 0.47                  | 0.31                   | 0.77     | 58.35 |
| 421 | 0.05                  | 0.39                   | 0.77     | 59.12 |
| 201 | 0.42                  | 0.07                   | 0.74     | 59.86 |
| 238 | 0.33                  | 0.59                   | 0.72     | 60.58 |
| 189 | 0.41                  | 0.15                   | 0.72     | 61.31 |
| 222 | 0.33                  | 0.15                   | 0.69     | 61.99 |
| 273 | 0.24                  | 0.50                   | 0.66     | 62.65 |
| 230 | 0.37                  | 0.10                   | 0.66     | 63.31 |
| 199 | 0.31                  | 0.22                   | 0.65     | 63.96 |
| 288 | 0.16                  | 0.33                   | 0.65     | 64.61 |
| 378 | 0.47                  | 0.32                   | 0.64     | 65.25 |
| 521 | 0.25                  | 0.30                   | 0.63     | 65.88 |
| 284 | 0.32                  | 0.20                   | 0.62     | 66.49 |
| 485 | 0.32                  | 0.06                   | 0.61     | 67.11 |
| 410 | 0.64                  | 0.71                   | 0.61     | 67.72 |
| 502 | 0.07                  | 0.32                   | 0.59     | 68.31 |
| 255 | 0.32                  | 0.21                   | 0.58     | 68.89 |
| 265 | 0.15                  | 0.29                   | 0.57     | 69.46 |
| 127 | 0.29                  | 0.05                   | 0.56     | 70.02 |

**Tab. S4:** Five most abundant OTUs in oxic and hypoxic zones of the Byfjord

|               | Oxic > 90 µmol/l oxygen |             |             |            |            | Hypoxic < 90 µmol/l oxygen |             |             |            |            | Overall     |             |             |            |            |
|---------------|-------------------------|-------------|-------------|------------|------------|----------------------------|-------------|-------------|------------|------------|-------------|-------------|-------------|------------|------------|
| BF March 2010 | 193 (11.%)              | 113 (8.4%)  | 188 (6.4%)  | 519 (6.2%) | 293 (5.8%) | 229 (14.0%)                | 193 (12.4%) | 269 (11.2%) | 194 (7.3%) | 285 (5.2%) | 193 (11.9%) | 229 (7.8%)  | 269 (6.2%)  | 113 (5.5%) | 194 (4.2%) |
| BF April 2010 | 113 (26.7%)             | 278 (9.3%)  | 293 (7.5%)  | 240 (5%)   | 388 (4.8%) | 193 (29.8%)                | 285 (9.7%)  | 229 (8%)    | 269 (6.3%) | 500 (4.4%) | 193 (25.2%) | 285 (8.2%)  | 229 (6.7%)  | 113 (6.2%) | 269 (5.3%) |
| BF June 2010  | 113 (22.5%)             | 261 (6.0%)  | 227 (3.7)   | 255 (3.4)  | 294 (3.2%) | 193 (23.3%)                | 285 (11.5%) | 194 (7.7%)  | 269 (6.3%) | 229 (3.6%) | 193 (16.5)  | 113 (8.6)   | 285 (8.0)   | 194 (5.7)  | 269 (4.3)  |
| BF Oct 2010   | 113 (10.5%)             | 293 (8.7%)  | 330 (7.8%)  | 479 (7.3%) | 193 (4.3)  | 193 (14.3%)                | 514 (12.9%) | 194 (6.4%)  | 269 (6.1%) | 332 (5.0%) | 193 (10.3%) | 514 (8.2%)  | 113 (5.2%)  | 293 (4.6%) | 330 (4.3%) |
| BF June 2011  | 113 (14.8%)             | 324 (5.5 %) | 293 (5.3%)  | 295 (4.6%) | 405 (3.9%) | 193 (11.4%)                | 113 (5.2%)  | 509 (5.1%)  | 324 (5.0%) | 204 (4.4%) | 113 (8.4%)  | 193 (8.1%)  | 324 (5.2%)  | 509 (4.1%) | 405 (3.8%) |
| BF Dec 2011   | 293 (19.2%)             | 113 (12.2%) | 330 (7.5%)  | 193 (6.8%) | 526 (4.7%) | 193 (13.8%)                | 293 (13.1%) | 113 (7.8%)  | 330 (6.4%) | 269 (5.4%) | 293 (15.5%) | 193 (11%)   | 113 (9.6%)  | 330 (6.7%) | 405 (4.5%) |
| BF March 2012 | 293 (18.4%)             | 113 (9.6%)  | 485 (6.9%)  | 188 (5.0%) | 393 (4.6%) | 293 (15.0%)                | 224 (10.1%) | 83 (9.2%)   | 113 (7.1%) | 207 (6.1%) | 293 (17.6%) | 113 (9.0%)  | 485 (5.2%)  | 188 (4.9%) | 224 (4.6%) |
| BF April 2012 | 113 (14%)               | 293 (9.9%)  | 188 (8.7%)  | 324 (7.6%) | 222 (4.9%) | ---                        | ---         | ---         | ---        | ---        | 113 (14%)   | 293 (9.9%)  | 188 (8.7%)  | 324 (7.6%) | 222 (4.9%) |
| KF Oct 2010   | 330 (12.1%)             | 113 (10.0%) | 193 (8.5%)  | 188 (6.4%) | 293 (5.9%) | 193 (39.8%)                | 263 (6.2%)  | 113 (5.7%)  | 326 (5.1%) | 328 (4.9%) | 193 (19.0%) | 113 (8.6%)  | 330 (8.3%)  | 293 (4.8%) | 526 (4.3%) |
| KF April 2012 | 113 (14.3%)             | 293 (10.5%) | 193 (7.6%)  | 188 (6.8%) | 324 (6.6%) | 193 (16.7%)                | 509 (14.9%) | 328 (6.9%)  | 207 (5.5%) | 287 (5.1%) | 193 (12.1%) | 113 (8.8%)  | 509 (8.2%)  | 293 (5.6%) | 324 (4.8%) |
| HF June 2011  | 113 (20.3%)             | 282 (5.7%)  | 324 (5.6%)  | 293 (5.2%) | 188 (5.1%) | 194 (18.6%)                | 227 (10.5%) | 204 (10.3%) | 509 (9.0%) | 526 (6.5%) | 113 (11.2%) | 194 (9.9%)  | 227 (7.5%)  | 204 (5.4%) | 526 (5.2%) |
| HF April 2012 | 113 (19.7%)             | 293 (11.4%) | 324 (10.3%) | 188 (6.2%) | 405 (3.7%) | 324 (16.2%)                | 113 (12.8%) | 405 (6.3%)  | 293 (5.9%) | 188 (4.4%) | 113 (18.0%) | 324 (11.8%) | 293 (10.0%) | 188 (5.7%) | 405 (4.3%) |

Identified

Tab. S5: Phylogenetic placement of 16S rRNA gene clones as determined by phylogenetic reconstruction

| Clone   | Phylum                 | Class                 | Order             | Family             | Genus                   | BsuRI |
|---------|------------------------|-----------------------|-------------------|--------------------|-------------------------|-------|
| BFB534* | Actinobacteria         | Actinobacteria        | Micrococcales     | Microbacteriaceae  | ML602J-51               |       |
| BFB670  | Bacteroidetes          | Flavobacteria         | Flavobacteriales  | Cryomorphaceae     | NS10 marine group       | 286   |
| BFB109  | Bacteroidetes          | Flavobacteria         | Flavobacteriales  | Flavobacteriaceae  | NS4 marine group        | 39    |
| BFB630* | Bacteroidetes          | Flavobacteria         | Flavobacteriales  | Flavobacteriaceae  | Sufflavibacter          |       |
| BFB539  | Bacteroidetes          | Flavobacteria         | Flavobacteriales  | Flavobacteriaceae  | uncultured              | 39    |
| BFB064  | Bacteroidetes          | Flavobacteria         | Flavobacteriales  | Flavobacteriaceae  | uncultured              | 284   |
| BFB639* | Bacteroidetes          | Flavobacteria         | Flavobacteriales  | Flavobacteriaceae  | uncultured              |       |
| BFB062  | Candidate division WS3 |                       |                   |                    |                         | 193   |
| BFB005  | Candidate division WS3 |                       |                   |                    |                         | 207   |
| BFB087* | Candidate division WS3 |                       |                   |                    |                         | 207   |
| BFB001* | Chlorobi               | Chlorobia             | Chlorobiales      | Clorobiaceae       | Chlorobium              | 515   |
| BFB036* | Chlorobi               | Chlorobia             | Chlorobiales      | Clorobiaceae       | uncultured              |       |
| BFB506* | Cyanobacteria          | Chloroplast           |                   |                    | Chloroplast             | 222   |
| BFB566  | Cyanobacteria          | Chloroplast           |                   |                    | Chloroplast             | 295   |
| BFB556  | Cyanobacteria          | Chloroplast           |                   |                    | Chloroplast             | 381   |
| BFB508  | Cyanobacteria          | Chloroplast           |                   |                    | Chloroplast             | 388   |
| BFB541  | Cyanobacteria          | Chloroplast           |                   |                    | Chloroplast             | 388   |
| BFB577  | Cyanobacteria          | Chloroplast           |                   |                    | Chloroplast             | 388   |
| BFB532  | Cyanobacteria          | Chloroplast           |                   |                    | Chloroplast             | 479   |
| BFB610  | Cyanobacteria          | Chloroplast           |                   |                    | Chloroplast             | 479   |
| BFB688* | Cyanobacteria          | Chloroplast           |                   |                    | Chloroplast             | 479   |
| BFB687* | Cyanobacteria          | Chloroplast           |                   |                    | Chloroplast             |       |
| BFB658* | Cyanobacteria          | Cyanobacteria         | Subsection I      | Family I           | Synechococcus           |       |
| BFB040  | Deferribacteres        | Deferribacteres       | Deferribacterales |                    | SAR406 clade            | 331   |
| BFB656* | OM27                   |                       |                   |                    |                         | 182   |
| BFB028  | Planctomycetes         | Planctomycetacia      | Planctomycetales  | Planctomycetaceae  | Pir4 lineage            | 252   |
| BFB563  | Planctomycetes         | Planctomycetacia      | Planctomycetales  | Planctomycetaceae  | Planctomyces            | 85    |
| BFB615  | Planctomycetes         | Planctomycetacin      | Planctomycetales  | Planctomyce        | Planctomyces            | 85    |
| BFB641  | Proteobacteria         | Alphaproteobacteria   | Rhodobacterales   | Rhodobacteraceae   | uncultured              | 39    |
| BFB518* | Proteobacteria         | Alphaproteobacteria   | Rhodobacterales   | Rhodobacteraceae   | uncultured              |       |
| BFB544  | Proteobacteria         | Alphaproteobacteria   | Rhodospirillales  | Rhodospirillaceae  | AEGEAN-169 marine group | 65    |
| BFB657* | Proteobacteria         | Alphaproteobacteria   | Rhodospirillales  |                    | uncultured              |       |
| BFB575  | Proteobacteria         | Alphaproteobacteria   | Rickettsiales     | Mitochondria       |                         | 358   |
| BFB509  | Proteobacteria         | Alphaproteobacteria   | Rickettsiales     | SAR11 Clade        | Candidatus Pelagibacter | 117   |
| BFB525  | Proteobacteria         | Alphaproteobacteria   | Rickettsiales     | SAR11 Clade        | Candidatus Pelagibacter | 117   |
| BFB535  | Proteobacteria         | Alphaproteobacteria   | Rickettsiales     | SAR11 Clade        | Chesapeake Bay          | 293   |
| BFB055  | Proteobacteria         | Alphaproteobacteria   | Rickettsiales     | SAR11 Clade        | Deep 1                  | 294   |
| BFB663  | Proteobacteria         | Alphaproteobacteria   | Rickettsiales     | SAR11 Clade        | Surface 1               | 117   |
| BFB696  | Proteobacteria         | Alphaproteobacteria   | Rickettsiales     | SAR11 Clade        | Surface 1               | 117   |
| BFB629* | Proteobacteria         | Alphaproteobacteria   | Rickettsiales     | SAR11 Clade        | Surface 1               | 117   |
| BFB523* | Proteobacteria         | Alphaproteobacteria   | Rickettsiales     |                    | SAR116 clade            | 289   |
| BFB572* | Proteobacteria         | Betaproteobacteria    | Burkholderiales   | Comamonadaceae     | BAL58 marine group      |       |
| BFB660  | Proteobacteria         | Deltaproteobacteria   | Bdellovibrionales | Bacteriovoraceae   | Peredibacter            | 258   |
| BFB061  | Proteobacteria         | Deltaproteobacteria   | Desulfobacterales | Desulfobacteraceae | Desulfobacula           | 273   |
| BFB011  | Proteobacteria         | Deltaproteobacteria   | Desulfobacterales | Desulfobacteraceae | Desulfobacula           | 424   |
| BFB071  | Proteobacteria         | Deltaproteobacteria   | Desulfobacterales | Desulfobacteraceae | Desulfobacula           | 424   |
| BFB074* | Proteobacteria         | Deltaproteobacteria   | Desulfobacterales | Desulfobacteraceae | Desulfobacula           | 424   |
| BFB008  | Proteobacteria         | Deltaproteobacteria   | Desulfobacterales | Desulfobacteraceae | Desulfobacula           | 425   |
| BFB038* | Proteobacteria         | Deltaproteobacteria   | Desulfobacterales | Desulfobacteraceae | Desulfobacula           |       |
| BFB063  | Proteobacteria         | Deltaproteobacteria   | Desulfobacterales | Desulfobulbaceae   | Desulfocapsa            | 203   |
| BFB065  | Proteobacteria         | Deltaproteobacteria   | Desulfobacterales | Desulfobulbaceae   | Desulfocapsa            | 228   |
| BFB003  | Proteobacteria         | Deltaproteobacteria   | Desulfobacterales | Desulfobulbaceae   | Desulfocapsa            | 269   |
| BFB018  | Proteobacteria         | Deltaproteobacteria   | Desulfobacterales | Desulfobulbaceae   | Desulfocapsa            | 269   |
| BFB046  | Proteobacteria         | Deltaproteobacteria   | Desulfobacterales | Desulfobulbaceae   | Desulfocapsa            | 269   |
| BFB101* | Proteobacteria         | Deltaproteobacteria   | Desulfobacterales | Desulfobulbaceae   | Desulfocapsa            | 269   |
| BFB050* | Proteobacteria         | Deltaproteobacteria   | Desulfobacterales | Desulfobulbaceae   | Desulfocapsa            | 269   |
| BFB103* | Proteobacteria         | Deltaproteobacteria   | Desulfobacterales | Desulfobulbaceae   | Desulfocapsa            | 271   |
| BFB015* | Proteobacteria         | Deltaproteobacteria   | Desulfobacterales | Desulfobulbaceae   | Desulfocapsa            |       |
| BFB047  | Proteobacteria         | Deltaproteobacteria   | Desulfobacterales | Desulfobulbaceae   | Desulfopila             | 228   |
| BFB059  | Proteobacteria         | Deltaproteobacteria   | Desulfobacterales | Desulfobulbaceae   | Desulfopila             | 269   |
| BFB550* | Proteobacteria         | Deltaproteobacteria   | Sh765B-TzT-29     |                    |                         | 386   |
| BFB034  | Proteobacteria         | Epsilonproteobacteria | Campylobacterales | Campylobacteraceae | Arcobacter              | 157   |
| BFB010  | Proteobacteria         | Epsilonproteobacteria | Campylobacterales | Campylobacteraceae | Arcobacter              | 228   |
| BFB024  | Proteobacteria         | Epsilonproteobacteria | Campylobacterales | Campylobacteraceae | Arcobacter              | 228   |
| BFB044  | Proteobacteria         | Epsilonproteobacteria | Campylobacterales | Campylobacteraceae | Arcobacter              | 228   |
| BFB060  | Proteobacteria         | Epsilonproteobacteria | Campylobacterales | Campylobacteraceae | Arcobacter              | 228   |
| BFB086  | Proteobacteria         | Epsilonproteobacteria | Campylobacterales | Campylobacteraceae | Arcobacter              | 228   |
| BFB098  | Proteobacteria         | Epsilonproteobacteria | Campylobacterales | Campylobacteraceae | Arcobacter              | 228   |
| BFB082* | Proteobacteria         | Epsilonproteobacteria | Campylobacterales | Campylobacteraceae | Arcobacter              | 228   |
| BFB056  | Proteobacteria         | Epsilonproteobacteria | Campylobacterales | Campylobacteraceae | Arcobacter              | 378   |
| BFB042  | Proteobacteria         | Epsilonproteobacteria | Campylobacterales | Campylobacteraceae | Arcobacter              | 503   |
| BFB115* | Proteobacteria         | Epsilonproteobacteria | Campylobacterales | Campylobacteraceae | Arcobacter              |       |

| Clone   | Phylum          | Class                 | Order              | Family              | Genus             | BsuRI |
|---------|-----------------|-----------------------|--------------------|---------------------|-------------------|-------|
| BFB077* | Proteobacteria  | Epsilonproteobacteria | Campylobacterales  | Campylobacteraceae  | Arcobacter        |       |
| BFB083  | Proteobacteria  | Epsilonproteobacteria | Campylobacterales  | Heliobacteraceae    | Sulfurimonas      | 500   |
| BFB027  | Proteobacteria  | Epsilonproteobacteria | Campylobacterales  | Heliobacteraceae    | Sulfurimonas      | 503   |
| BFB035* | Proteobacteria  | Epsilonproteobacteria | Campylobacterales  | Heliobacteraceae    | Sulfurimonas      |       |
| BFB070  | Proteobacteria  | Epsilonproteobacteria | Campylobacterales  |                     | Sulfurovum        | 506   |
| BFB524* | Proteobacteria  | Gammaproteobacteria   | Alteromonadales    | Alteromonadaceae    | OM60 (NOR5) clade |       |
| BFB594* | Proteobacteria  | Gammaproteobacteria   | Oceanospirillales  |                     | SAR86             | 188   |
| BFB106  | Proteobacteria  | Gammaproteobacteria   | Oceanospirillales  |                     | SUP05             | 228   |
| BFB016* | Proteobacteria  | Gammaproteobacteria   | Oceanospirillales  |                     | SUP05             |       |
| BFB006  | Proteobacteria  | Gammaproteobacteria   | Oceanospirillales  |                     | ZA2525c           | 193   |
| BFB022  | Proteobacteria  | Gammaproteobacteria   | Oceanospirillales  |                     | ZA2525c           | 193   |
| BFB097* | Proteobacteria  | Gammaproteobacteria   | Oceanospirillales  |                     | ZA2525c           |       |
| BFB025  | Spirochaete     | Spirochaetes          | Spirochaetales     |                     | MSBL8             | 194   |
| BFB058  | Spirochaete     | Spirochaetes          | Spirochaetales     |                     | MSBL8             | 194   |
| BFB099  | Spirochaete     | Spirochaetes          | Spirochaetales     |                     | MSBL8             | 194   |
| BFB041* | Spirochaete     | Spirochaetes          | Spirochaetales     |                     | MSBL8             | 194   |
| BFB026* | Spirochaete     | Spirochaetes          | Spirochaetales     |                     | MSBL8             |       |
| BFB080* | Spirochaete     | Spirochaetes          | Spirochaetales     |                     | MSBL8             |       |
| BFB084  | TM6             |                       |                    |                     |                   | 190   |
| BFB507* | Verrucomicrobia | Opitutae              | MB11C04            |                     |                   |       |
| BFB676  | Verrucomicrobia | Verrucomicrobiae      | Verrucomicrobiales | Verrucomicrobiaceae | Roseibacillus     | 221   |

\*single read sequence
